# Supplementary material for: Poloxamer-Based Hydrogel as Drug Delivery System: How Polymeric Excipients Influence the Chemical-Physical Properties
Source: MDPI journal article supplement (doi:10.3390/polym14173624), 2022-09-01
Supplement: s1 [file s1]

## Supplementary Materials

### Poloxamer-Based Hydrogel as Drug Delivery System: How Polymeric Excipients Influence the Chemical-Physical Properties

Elisa Brambilla <sup>†</sup>, Silvia Locarno <sup>†,\*</sup>, Salvatore Gallo, Francesco Orsini, Marco Farronato, Carolina Pini, Douglas Vieira Thomaz, Cristina Lenardi, Marco Piazzoni and Gianluca Tartaglia

**Table S1.** T<sub>sol-gel</sub> obtained according to method A and B of P407 formulations with additives prepared in water and PBS.

| ID<br>formulation | P407<br>% | Additive %     | T <sub>sol/gel</sub> (°C) |          |         |
|-------------------|-----------|----------------|---------------------------|----------|---------|
|                   |           |                | Method A                  | Method B | Average |
| F1                | 20        | -              | 21.3                      | 22.5     | 21.9    |
| F2                | 18        | -              | 24.5                      | 26.6     | 25.5    |
| F3                | 15        | -              | 38.5                      | >40      | 38.5    |
| F4                | 13        | -              | _*                        | _*       | _*      |
| F5                | 18        | XG 0.2         | 21                        | 23       | 22.0    |
| F6                | 18        | E407 0.2       | 24                        | 26       | 25.0    |
| F7                | 18        | HPMC 1         | 22                        | 23       | 22.5    |
| F8                | 18        | PVP 4          | _*                        | _*       | _*      |
| F9                | 18        | PVP 4 - HMPC 1 | 21                        | 23       | 22.0    |
| F10               | 18        | -              | 23                        | 25       | 24.0    |
| F11               | 18        | XG 0.2         | 21                        | 22       | 21.5    |
| F12               | 18        | E407 0.2       | 22                        | 24       | 23.0    |
| F13               | 18        | HPMC 0.5       | 21                        | 23       | 22.0    |
| F14               | 18        | PVP 4 – HMPC 1 | 19                        | 20       | 19.5    |

\* The gelation did not occur in the range 4-50 °C.

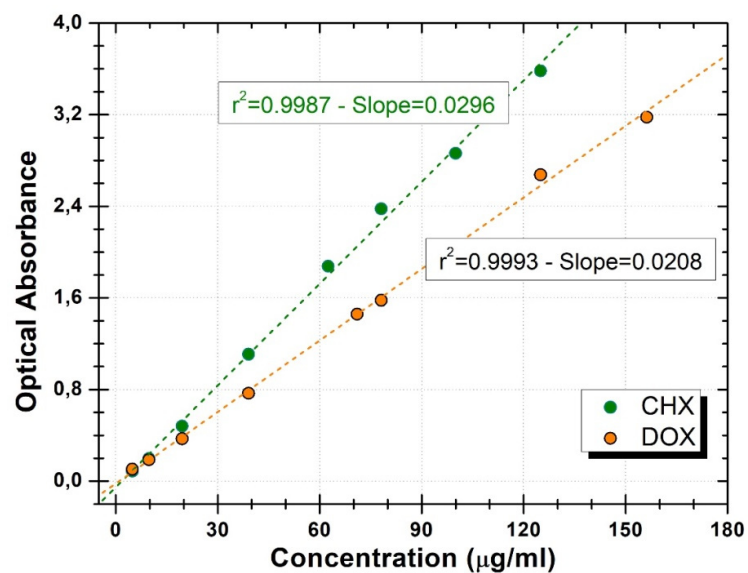

Figure S1. Calibration curve of CHX and DOX in PBS 1x

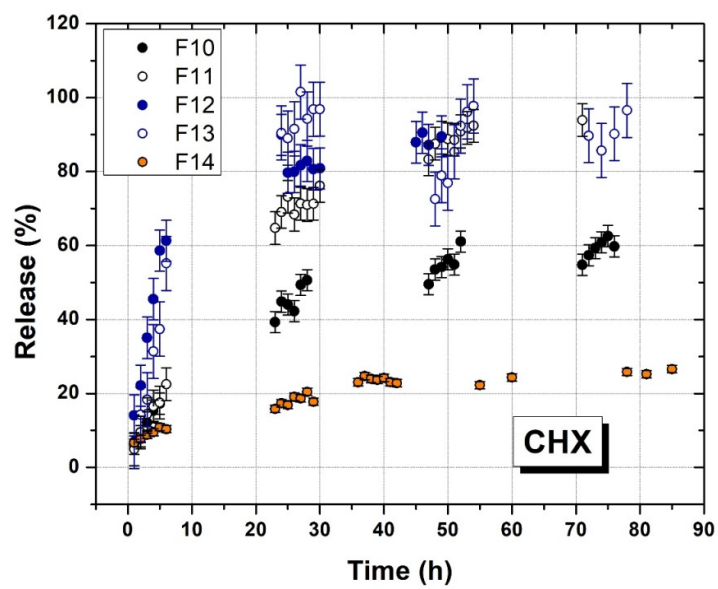

Figure S2. Cumulative percentage CHX released over the time. Data are expressed ad mean  $\pm$  S.D. for n = 3.

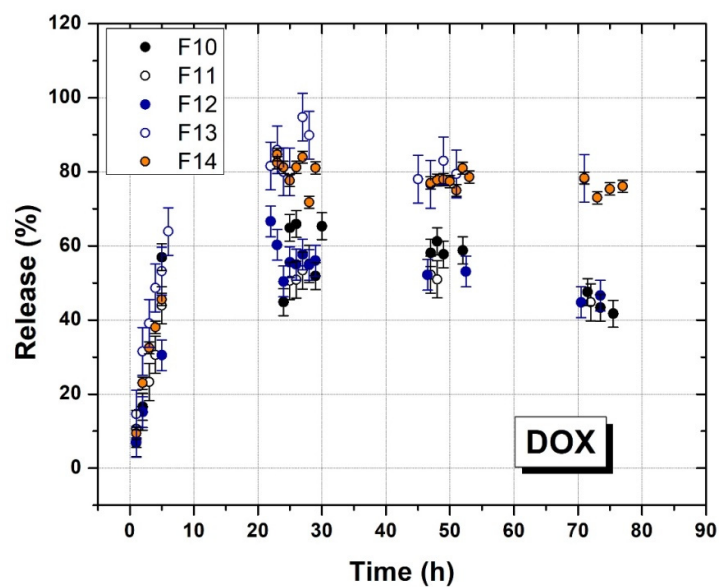

**Figure S3.** Cumulative percentage DOX released over the time. Data are expressed as mean  $\pm$  S.D. for  $n = 3$ .

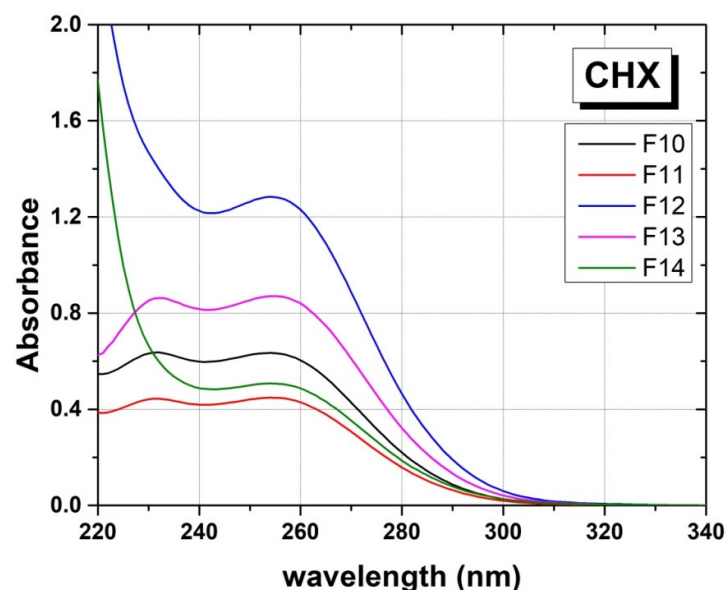

**Figure S4.** Absorbance spectrum of CHX in the studied formulations (F10-F14).

The analysis highlighted the ability of CHX of interacting with the polymers, in fact, the presence of the polymers changed the absorbed peak of the molecule. In particular this was evident in presence of E407 (F12) and HPMC alone (F13) which could explain the faster release rate observed in the main text.
